# Supplementary material for: Microfluidic particle counter visualizing mucosal antibodies against SARS-CoV-2 in the upper respiratory tract for rapid evaluation of immune protection
Source: Royal Society of Chemistry journal article supplement (doi:10.1039/d4lc00118d), 2024-01-01
Supplement: d4lc00118d1.pdf [file d4lc00118d1.pdf]

1 **Supplementary information**

2 **Microfluidic Particle Counter Visualizing Mucosal Antibody Levels against SARS-CoV-2 in the**  
3 **Upper Respiratory Tract for Rapid Evaluation of Immune Protection**

4 **Authors**

5 Jiaheng Li<sup>a</sup>, Lok Ting Chu<sup>b</sup>, Hogi Hartanto<sup>a</sup>, Guihuan Guo<sup>a</sup>, Lu Liu<sup>a</sup>, Jianpeng Wu<sup>a</sup>, Minghui Wu<sup>a</sup>, Chenyu  
6 Cui<sup>a</sup>, Gaobo Wang<sup>a</sup>, Wengang Liu<sup>a</sup>, Hoi Kwan Kwong<sup>a</sup>, Siying Wu<sup>a</sup>, and Ting-Hsuan Chen<sup>a,c,d,\*</sup>.

7 **Affiliations**

8 <sup>a</sup>Department of Biomedical Engineering, City University of Hong Kong, Kowloon, Hong Kong SAR, China.  
9

10 <sup>b</sup>Department of Biochemistry and Molecular Biology, School of Basic Medical Sciences, Guang Dong  
11 Medical University, Zhanjiang, China.

12 <sup>c</sup>City University of Hong Kong Shenzhen Research Institute, Shenzhen, China.

13 <sup>d</sup>Hong Kong Centre for Cerebro-cardiovascular Health Engineering, Hong Kong Science Park, Hong  
14 Kong SAR, China.

15 \*Corresponding Author. Email: [thchen@cityu.edu.hk](mailto:thchen@cityu.edu.hk).

16 **1. Methods and materials**

17 **1.1 Reagents and materials**

18 In the microparticle system, carboxyl MMPs (catalog no. PMC3HP, 11653, 3.06  $\mu\text{m}$  in diameter,  $\sim 1.4 \text{ g/cc}$  - 1.8  
19  $\text{g/cc}$ ) and carboxyl PMPs (catalog no. PC07002, 12793, 15.3  $\mu\text{m}$  in diameter,  $\sim 1.05 \text{ g/cc}$  - 1.1  $\text{g/cc}$ ) were  
20 purchased from Bangs Laboratories Inc., USA. Powder of 1-Ethyl-3-(3-dimethylaminopropyl) carbodiimide  
21 hydrochloride (EDC), N-hydroxysuccinimide (NHS) and Dulbecco's phosphate-buffered saline (DPBS), goat anti-  
22 human IgG (H+L) antibody (catalog no. A18813), blocker casein (catalog no. 37582) were purchased from  
23 Thermo Fisher Scientific, USA. 2-(N-morpholino) ethane-sulfonic acid (MES) and trichloro (1H, 1H, 2H, 2H-  
24 perfluorooctyl) saline (97%) was ordered from J&K Scientific, USA. The 96% Tween 20 solution (catalog no.  
25 T8220) was from Solarbio, China. SARS-CoV-2 spike protein RBD (mFc Tag) (catalog no. ABIN691175) was  
26 ordered from antibodies-online, USA. The target protein, anti-SARS-CoV-2 spike RBD neutralizing antibody,  
27 human IgG1 (catalog no. SAD-S35) was purchased from Acro biosystems, USA. Pre SARS-CoV-2 human serum  
28 (catalog no. 009-000-234, Jackson ImmunoResearch Laboratories INC., USA) diluted (1:50) in the commercial  
29 nasal fluid (catalog no. BZ251-0922A, Biochemazone, Canada) was used to simulate the complex mucosal  
30 specimen.

31 For chip fabrication, PDMS (Sylgard TM184) was ordered from Dow Corning, USA. SU8 2015 photoresist was  
32 purchased from Gersteltec Sarl, Switzerland. The silicon wafer was bought from Suzhou Crystal Silicon Electronic  
33 & Technology Co. Ltd, China. Hydroxy-terminated PDMS (viscosity: 25 cSt; 481939) was from Sigma-Aldrich,  
34 USA.

35 For sampling, the sterile nasal swabs were from Kanmine Co., Ltd, China. The disposable sterile blood collection  
36 needle was from Icare Medical Supply Inc., and the glass capillary with 75- $\mu\text{l}$  capacity was from Hirschmann.

## 37 1.2 Collection of volunteer specimens

38 Clinical samples were collected under the Human Subjects Ethics Subcommittee in City University of  
39 Hong Kong approved study protocol (ref no.: HU-STA-00000211). Eighty-seven volunteers who  
40 received at least two doses of SARS-CoV-2 vaccination were recruited for the collection and informed  
41 consent from each volunteer was obtained. The volunteers were required to do a SARS-CoV-2 antigen  
42 rapid test before arrival, and those who got negative results were invited for sampling. All materials,  
43 including nasal swabs, disposable blood collection needles, tubes, etc, used in the sampling are  
44 sterilized. For collection of nasal secretion, the swab was inserted and carefully stirred for 10 s in both  
45 the left and right nostrils to stimulate the production of NS. After taking a 10 s break, the swab was again  
46 inserted in the nostrils and stirred for 20 s to get enough NS. The swab was weighed before and after  
47 sampling to ensure NS weight to be approximately 80 mg (~80 µl). Considering the variance among  
48 human subjects, the actual weight was recorded to calculate elution factors defined as (NS weight  
49 difference + 120)/NS weight. After sampling, the swabs were immediately inserted in the sterile tube  
50 containing 120 µl elution buffer (1% Tween 20 in 1% bovine serum albumin (BSA) solution) and stirred  
51 continuously for 3 min to fully elute the secretions. After disposing of the swab in the biological waste  
52 bags, the remaining supernatant (NS solution, around 80 µl) was aliquoted in four protein lobind tubes  
53 for 20 µl per tube. Finally, the tubes containing NS solutions were marked and stored at -80 °C until use.  
54 For fingerstick blood collection, A disposable sterile blood collection needle was used to puncture the  
55 fingertips to collect 75 µl of finger-prick blood using a glass capillary coated with an anticoagulant. Next,  
56 the fingers were wiped with a cotton swab moistened with alcohol and wrapped with an adhesive  
57 bandage. The collected blood was transferred into a 500 µl centrifuge tube and centrifuged at 4 °C,  
58 10500 rpm for 10 min to remove blood cells and isolate the plasma. Lastly, the obtained plasma was  
59 marked and stored at -80 °C until use.

60

### 61 1.3 Enzyme-linked immunosorbent assay (ELISA) for human sample detection.

62 The 96-well SARS-CoV-2 IgG ELISA kits (catalog no. K-16027-001, Advansta, USA) targeting spike RBD  
63 were used according to the provided protocol. For sample preparation, standard and control samples  
64 were created by serial dilutions of anti-spike RBD IgG in model solution and commercial human serum.  
65 The unknown human NS samples and plasma samples were diluted 20 times and 250 times respectively  
66 with AdvanBlock-EIA solution before use. To prepare the ELISA, a volume of 100 µl of antigen solution  
67 prepared by diluting the spike RBD stock solution (200 µg/ml) in 1× EIA coating buffer 100 times was  
68 added to each well and incubated at room temperature for one hour. After that, the wells were washed  
69 3 times with 250 µl 1 × AdvanWash Washing Solution. Next, the wells were blocked with 250 µl  
70 AdvanBlock-EIA solution for 30 min at room temperature to block spare binding sites. After washing 3  
71 times with 1 × AdvanWash Washing Solution and completely removing the solutions, 50 µl of diluted  
72 samples, including the standard samples, controls and unknown volunteer samples were quickly  
73 transferred into the assay plate in duplicate and sealed to incubate for another 1h at room temperature.  
74 Then, the cover tape was removed and the plate was washed 3 times again, followed by adding 100  
75 µl/well of Anti-IgG horseradish peroxidase (HRP) conjugate and incubate for 30 min at room  
76 temperature. After washing the plate 3 times, 100 µl/well TMB substrate solution was added and  
77 incubated for 30 min at room temperature in the dark before adding 100 µl/well stop solution. The  
78 color of the mixture immediately changed from blue to yellow. After the reaction, the plate was put in a  
79 microplate reader (SpectraMax M5e Multi-Mode Microplate Reader, Molecular Devices) to measure  
80 absorbance at 450nm.

## 81 2. Supplementary figures and tables

### 82 Supplementary Figure S1

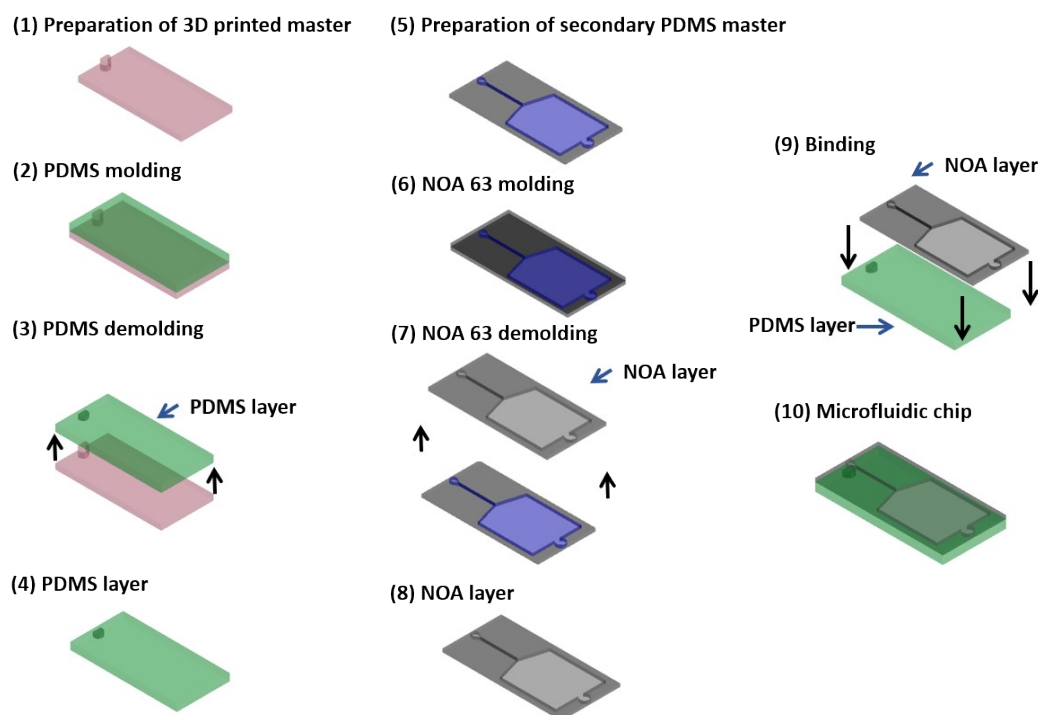

83

84 **Figure S1. The fabrication process of the PDMS and NOA 63 microfluidic chip.** (a) Preparation of  
 85 the 3D printed mold for PDMS layer. (b) PDMS layer prepared by casting on the 3D printed mold. (c)  
 86 PDMS layer curing and demolding. (d) The final completed PDMS layer. (e) Secondary PDMS layer  
 87 prepared by casting on first PDMS that was made with photolithography. (f) NOA 63 molding on  
 88 secondary PDMS master layer. (g) UV curing, demolding and cutting of NOA 63 layer. (h) The final  
 89 completed NOA 63 layer. (i) Bonding between PDMS and NOA 63 layer after plasma treatment. (j) The  
 90 final completed PDMS-NOA 63 microfluidic chip.

91 **Supplementary Figure S2**

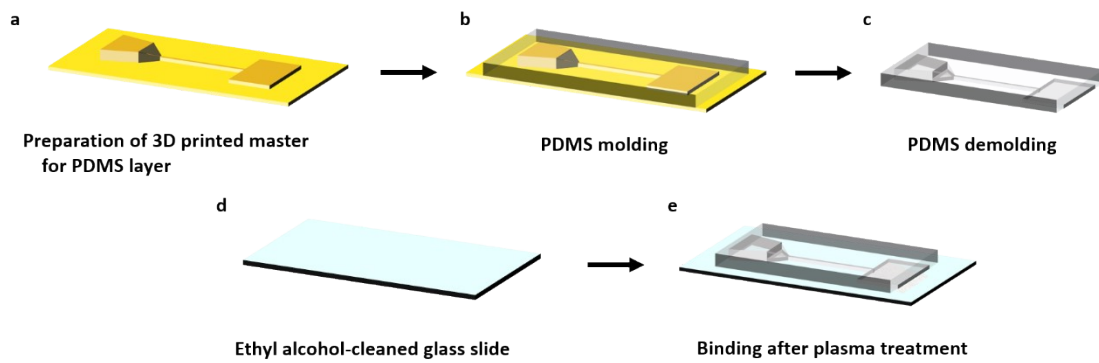

93 **Figure S2. The work steps for fabricating the PDMS and glass microfluidic chip.** (a) Preparation of  
94 the 3D printed mold for PDMS layer. (b) PDMS layer prepared by casting on the 3D printed mold. (c)  
95 PDMS layer curing and demolding. (d) Ethyl alcohol-cleaned glass slide. € The final completed PDMS-  
96 glass microfluidic chip bonding between the tape-cleaned PDMS layer and NOA 63 layer after plasma  
97 treatment.

## 98 Supplementary Figure S3

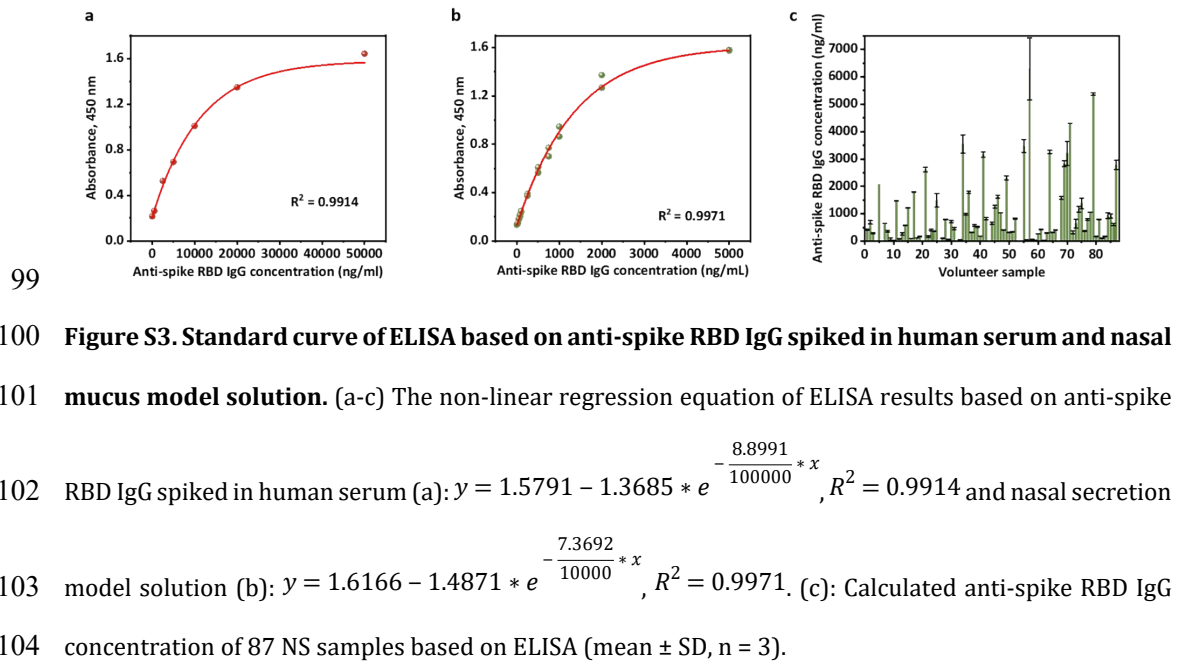

105 **Supplementary Figure S4**

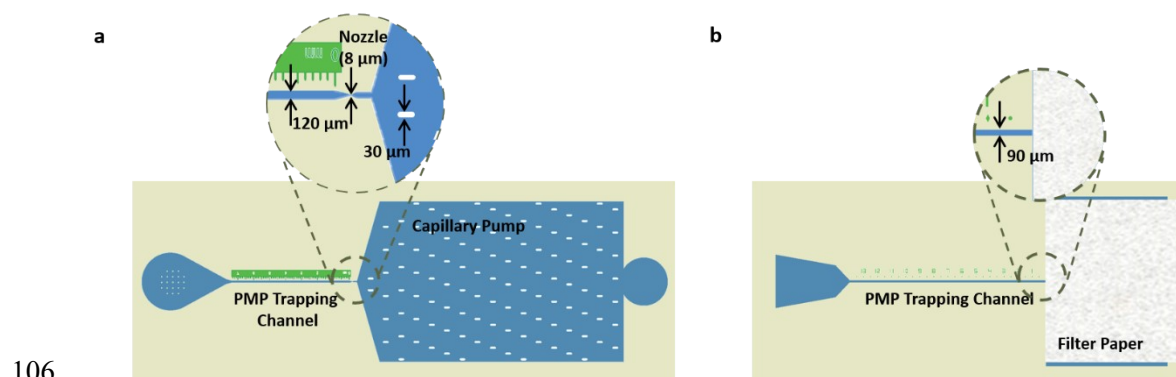

107 **Figure S4. Schematics of PDMS-NOA 63 microfluidic chip with 8 μm nozzle (a) and PDMS-glass**  
 108 **microfluidic chip with filter paper (b).**



109 **Supplementary Figure S5**

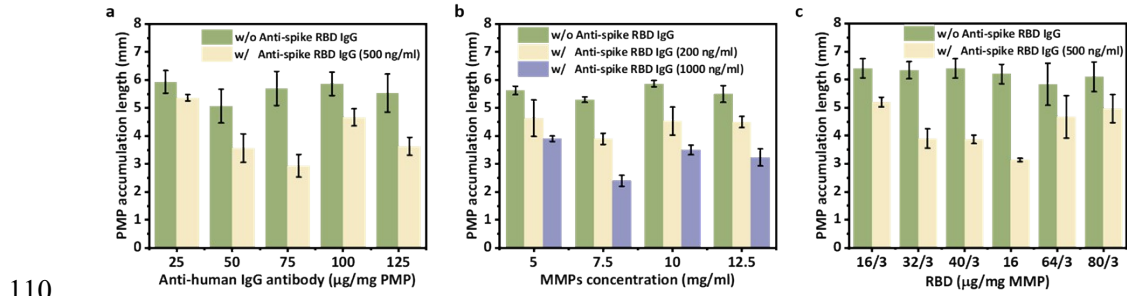

111 **Figure S5. Optimization of MMPs concentration and protein immobilization on microparticles**  
 112 **for anti-spike RBD IgG detection in nasal secretion model solution using microparticle**  
 113 **microfluidic particle counter system (mean  $\pm$  SD, n=3).** Optimization of (a) anti-human IgG on PMPs

114 (other conditions: 20 mg/ml of PMPs, 7.5 mg/ml of MMPs,  $\frac{40}{3}$  µg of RBD per milligram of MMPs), (b)  
 115 MMPs concentration (other conditions: 20 mg/ml of PMPs, 75 µg of anti-human IgG per mg of PMPs,  
 116  $\frac{40}{3}$  µg of RBD per mg of MMPs), and (c) RBD on MMPs (other conditions: 20 mg/ml of PMPs, 7.5 mg/ml  
 117 of MMPs, 75 µg of anti-human IgG per mg of PMPs).

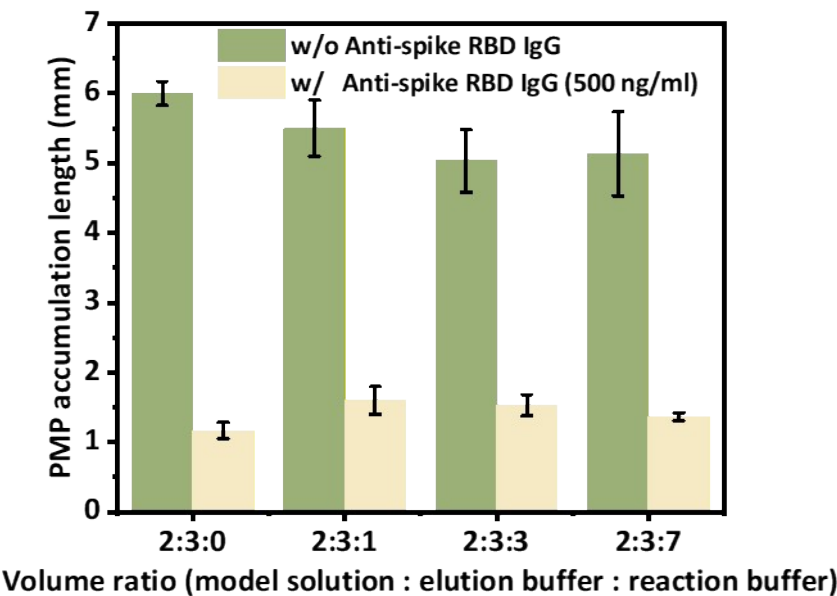

119

120 **Figure S6. Optimization of volume ratio between model solution, elution buffer and reaction**  
121 **buffer for microfluidic particle counter system (mean  $\pm$  SD, n=3), explaining the combination**  
122 **effect of viscosity and reaction volume on reaction efficiency.** The volume ratio between the model  
123 solution and elution buffer was consistent with the ratio used in the human sample collection as  
124 approximately 2 : 3 (80  $\mu$ l : 120  $\mu$ l).

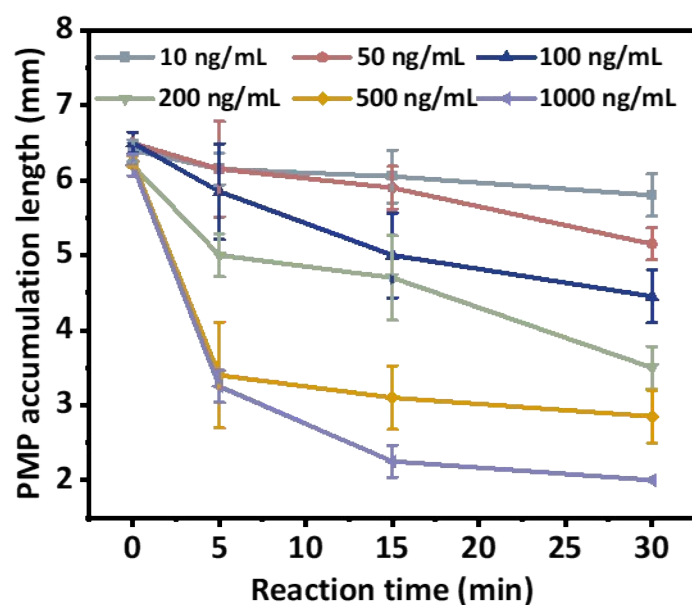

126

127 **Figure S7. Optimization of reaction time for both first and second incubation of the microfluidic**  
 128 **particle counter system (mean  $\pm$  SD, n=2).** The reaction time was optimized by incubating different  
 129 concentrations of anti-spike RBD IgG in nasal mucus model solution (10, 50, 100, 200, 500, 1000 ng/ml)  
 130 at (0, 5, 15, 30) min for both first and second incubation.

131 Supplementary Figure S8

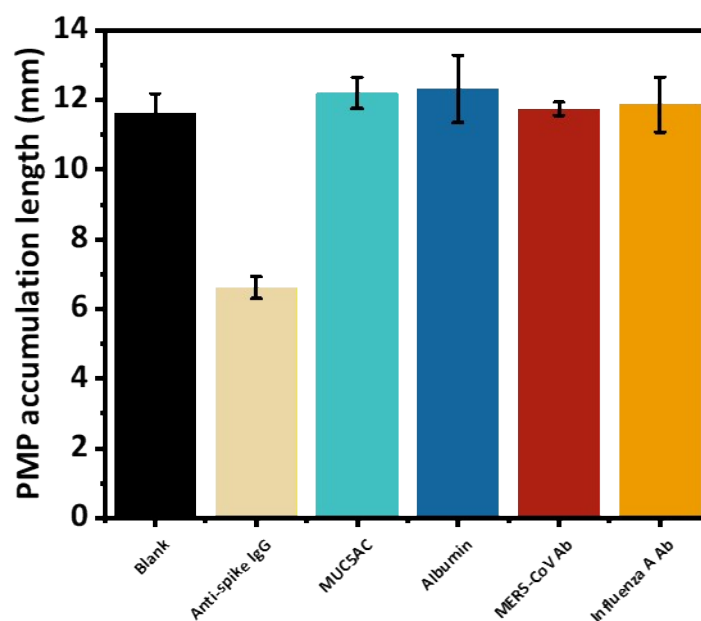

132

133 Figure S8. Specificity detection of the system. Measurement of PMP accumulation against other  
 134 interference with higher concentration (mean  $\pm$  95% confidence interval, n = 3).

135 **Supplementary Figure S9**

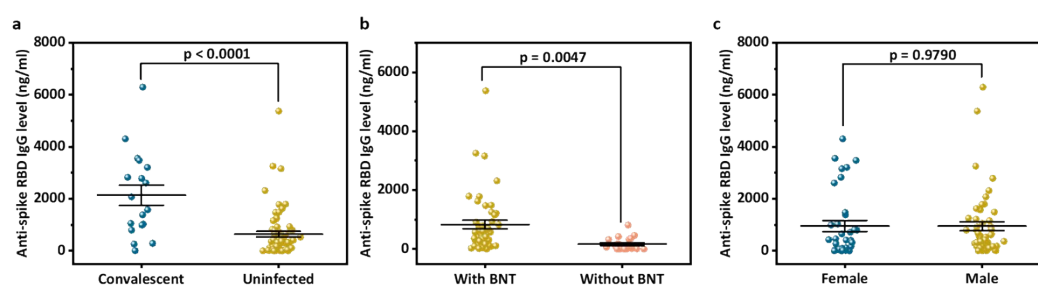

136

137 **Figure S9. Analysis of level of anti-spike RBD IgG based on infection, gender and vaccine type by**

138 **ELISA.** (a-c) Level of anti-spike RBD IgG in nasal mucus based on infection (a), vaccine type (b) and

139 gender (c).

## 140 Supplementary Figure S10

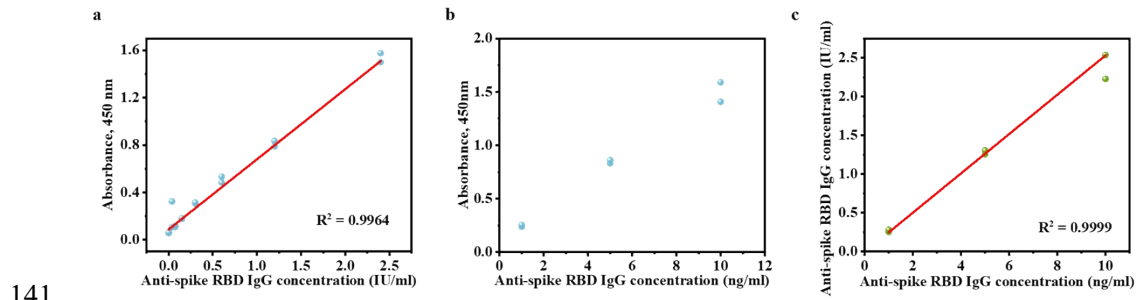

142 **Figure S10. Unit conversion from IU/ml to ng/ml.** (a) For the standard solution of concentration  
 143 from 0 to 2.5 IU/ml, the linear regression equation:  $y = 0.0874 + 0.5925 * x$  ( $R^2 = 0.9964$ ). (b) The  
 144 optical density at the wavelength of 450 nm was obtained using different concentrations of standard  
 145 solutions in ng/ml (1, 5, 10 ng/ml). (c) For unit conversion of anti-spike RBD IgG from ng/ml to IU/ml,  
 146 the linear regression equation:  $y_{(IU/ml)} = -0.0056 + 0.2538 * x_{(ng/ml)}$  ( $R^2 = 0.9999$ ). Based on the  
 147 conversion equation, the protection threshold of 645 IU/ml equals to 2541.5 ng/ml.

148 **Table S1.** The acronyms and the corresponding full names

| Acronyms                  | Full names                                                            |
|---------------------------|-----------------------------------------------------------------------|
| SARS-CoV-2                | Severe Acute Respiratory Syndrome Coronavirus 2                       |
| COVID-19                  | Coronavirus Disease 19                                                |
| RBD                       | Receptor Binding Domain                                               |
| LOD                       | Limit of Detection                                                    |
| S Protein                 | Spike Protein                                                         |
| MMPs                      | Magnetic Microparticles                                               |
| PMPs                      | Polystyrene Microparticles                                            |
| IgG                       | Immunoglobulin G                                                      |
| Anti-spike RBD IgG        | IgG Antibody against SARS-CoV-2 Spike Protein Receptor-Binding Domain |
| Anti-human IgG            | Secondary Antibody against Human IgG                                  |
| S-specific IgG            | IgG Antibody against Spike Protein                                    |
| S1 RBD                    | Spike1 Protein Receptor-Binding Domain                                |
| N-specific subgenomic RNA | Specific Subgenomic Ribonucleic Acid of Nucleocapsid Protein          |
| ACE2                      | Angiotensin-converting Enzyme 2                                       |
| ELISA                     | Enzyme-Linked Immunosorbent Assay                                     |
| POCT                      | Point-of-care Testing                                                 |
| LFIA                      | Lateral Flow Immunoassays                                             |
| BSA                       | Bovine Serum Albumin                                                  |
| NS                        | Nasal Secretion                                                       |
| PBS                       | Phosphate Buffered Saline                                             |
| MUC5AC                    | Mucin-5AC                                                             |
| MERS-CoV                  | Middle East Respiratory Syndrome Coronavirus                          |
| EDC                       | 1-ethyl-3-(3-dimethylaminopropyl)carbodiimide Hydrochloride           |
| NHS                       | N-hydroxysuccinimide                                                  |
| MES                       | 2-(N-Morpholino)ethanesulfonic Acid                                   |
| PDMS                      | Polydimethylsiloxane                                                  |
| HRP                       | Horseradish Peroxidase                                                |
| OD450                     | Optical Density at the Wavelength of 450 nm                           |
| NOA63                     | Norland Optical Adhesive 63                                           |
| 3D-Printing               | Three-dimensional-printing                                            |
| UV                        | Ultraviolet                                                           |
| HMDS                      | Hexamethyldisilane                                                    |
| CVD                       | Chemical Vapor Deposition                                             |

149

### 150 3 Data processing and analysis

#### 151 3.1 Linear regression

152 In a linear model,  $y = b_0 + b_1x$  was considered to perform least-squares regression, where  $y$  is the  
 153 dependent variable, representing the predicted result for a given independent variable,  $x$ . In this study,  
 154 the model is used in both sensitive and rapid modes, while  $y$  represents the PMP accumulation length  
 155 of the microfluidic chip and  $x$  is the anti-SARS-CoV-2 spike RBD IgG concentration. The constants applied  
 156 in the calculating formula including the estimates of the intercept  $b_0$ , the slope  $b_1$ , their variances  $s_{b_0}^2$ ,  
 157  $s_{b_1}^2$  and the residual variance of the regression  $\frac{s_y^2}{x}$  were determined with the below equations:

$$158 \quad b_0 = \bar{y} - b_1\bar{x} \quad (1)$$

$$159 \quad b_1 = \frac{\sum_{i=1}^n (x_i - \bar{x})y_i}{\sum_{i=1}^n (x_i - \bar{x})^2} \quad (2)$$

$$160 \quad s_{b_0}^2 = s_{\frac{y}{x}}^2 \left( \frac{1}{n} + \frac{\bar{x}^2}{\sum_{i=1}^n (x_i - \bar{x})^2} \right) \quad (3)$$

$$161 \quad s_{b_1}^2 = \frac{\frac{s_y^2}{x}}{\sum_{i=1}^n (x_i - \bar{x})^2} \quad (4)$$

$$162 \quad s_{\frac{y}{x}}^2 = \frac{\sum_{i=1}^n (y_i - \hat{y}_i)^2}{n - 2} \quad (5)$$

163 Where  $x_i$  (anti-SARS-CoV-2 spike RBD IgG concentration) and  $y_i$  (PMP accumulation length) are the

164 paired data got from the experiments,  $n$  is the total number of data points calculated by  $n = \sum_{j=1}^k m_j$ ,  $k$  is



165 the number of concentration levels,  $m_j$  is the times of repetition at each concentration level,  $\bar{x}$  and  $\bar{y}$ , is  
 166 the mean value of  $x_i$  and  $y_i$ , as shown below:

$$\bar{x} = \sum_{i=1}^n \frac{x_i}{n} \quad (6)$$

$$\bar{y} = \sum_{i=1}^n \frac{y_i}{n} \quad (7)$$

169 And  $\hat{y}_i$  is the predicted value of y for a particular concentration  $x_i$ , as shown in equation:

$$\hat{y}_i = b_0 + b_1 x_i \quad (8)$$

171 Hence, the calibration curve is expressed as:

$$y = b_0 + b_1 x \pm t_{(\alpha, n-2)} \frac{s_y}{x} \left( \frac{1}{m} + \frac{1}{n} + \frac{(x - \bar{x})^2}{\sum_{i=1}^n (x_i - \bar{x})^2} \right)^{\frac{1}{2}} \quad (9)$$

173 Where  $t_{(\alpha, n-2)}$  is the critical value of student t distribution, which is selected as 1.645 for the 90%  
 174 confidence interval of two-tailed hypothesis ( $\alpha = 0.05$ ), and  $\frac{1}{m}$  is the contribute of uncertainty from the  
 175 average of m replicates in future observation<sup>1,2</sup>.

### 176 3.2 Limit of Detection (LOD)

177 For the estimation of the limits of detection  $x_D$ , a non-central t-distribution model is selected with the  
 178 equation:

$$x_D = \delta_{(\alpha, \beta, n-2)} \frac{s_y}{b_1} \left( 1 + \frac{1}{n} + \frac{\bar{x}^2}{\sum_{i=1}^n (x_i - \bar{x})^2} \right)^{\frac{1}{2}} \quad (10)$$

180 Where  $\delta_{(\alpha, \beta, n-2)}$  is the non-centrality value of the non-central t-distribution taking protection against  
 181 both type I error rate ( $\alpha$ , false-positive) and type II error rate ( $\beta$ , false-negative)<sup>1,2</sup>. The other constant

182 variances were calculated the above equations. All LOD was determined based on an appropriate linear  
183 range evaluated by the  $R^2$ .

### 184 3.3 Accuracy

185 The measured antibody level by microfluidic chip (Y) is compared with that by the gold standard  
186 method ELISA (X) to study the accuracy. The agreement between two sets of measured antibody levels  
187 of the 74/84 volunteers' nasal mucus samples is quantified using Lin's concordance correlation  
188 coefficient ( $\hat{\rho}_C$ ), as shown below:

$$189 \quad \hat{\rho}_C = \frac{2\rho\sigma_x\sigma_y}{(\mu_Y - \mu_x)^2 + \sigma_Y^2 + \sigma_X^2} \quad (11)$$

190 Where  $\mu_Y$  and  $\mu_x$  are the means,  $\sigma_Y^2$  and  $\sigma_x^2$  are the variances, and  $\rho$  is Pearson's correlation coefficient<sup>3</sup>.

191 **Reference**

- 192 (1) Clayton, C. A.; Hines, J. W.; Elkins, P. D. Detection limits with specified assurance  
193 probabilities. *Analytical Chemistry* **1987**, 59 (20), 2506-2514.  
194 (2) Lavagnini, I.; Magno, F. A statistical overview on univariate calibration, inverse regression,  
195 and detection limits: Application to gas chromatography/mass spectrometry technique.  
196 *Mass spectrometry reviews* **2007**, 26 (1), 1-18.  
197 (3) Lawrence, I.; Lin, K. A concordance correlation coefficient to evaluate reproducibility.  
198 *Biometrics* **1989**, 255-268.

199
